# Supplementary material
Source: MDPI journal article supplement (https://www.mdpi.com/2297-8739/10/3/203)
Supplement: s1 [file s1]

Supplementary Materials

# Rapid Simultaneous Determination of 11 Synthetic Cannabinoids in Urine by Liquid Chromatography-Triple Quadrupole Mass Spectrometry

Jianbing Wu <sup>1</sup>, Fan Zhang <sup>2</sup>, Xing Ke <sup>1</sup>, Wei Jia <sup>2</sup>, Xuzhi Wan <sup>2</sup>, Lange Zhang <sup>2</sup>, Yilei Fan <sup>1</sup>, Jing Zhou <sup>1,\*</sup>

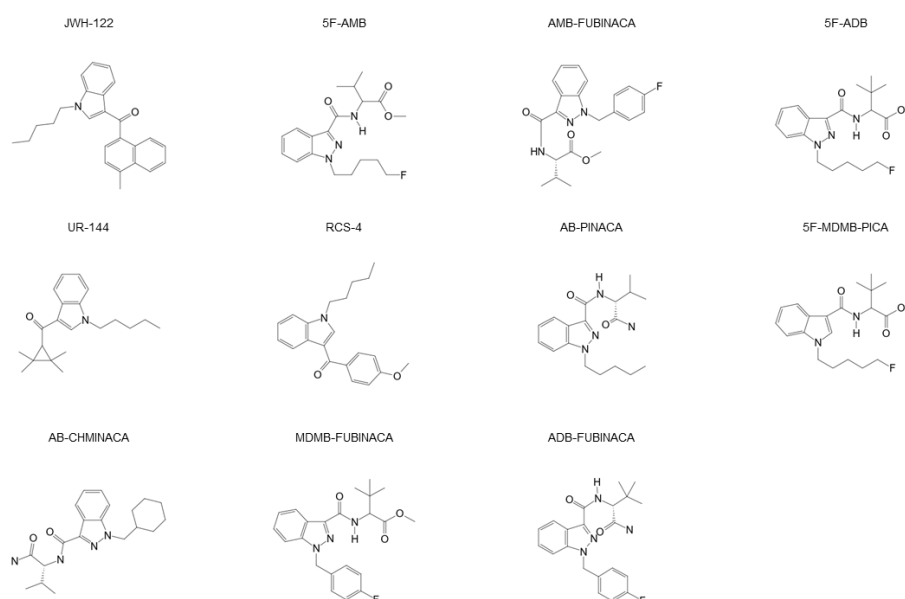

**Figure S1.** The chemical structures of the 11 SCs.
